# Supplementary material for: Enhancing EQ-5D-5L Sensitivity in Capturing the Most Common Symptoms in Post-COVID-19 Patients: An Exploratory Cross-Sectional Study with a Focus on Fatigue, Memory/Concentration Problems and Dyspnea Dimensions
Source: MDPI journal article supplement (doi:10.3390/ijerph21050591), 2024-05-03

## Supplementary materials

Figure S1: The prevalence of symptoms in the study population.

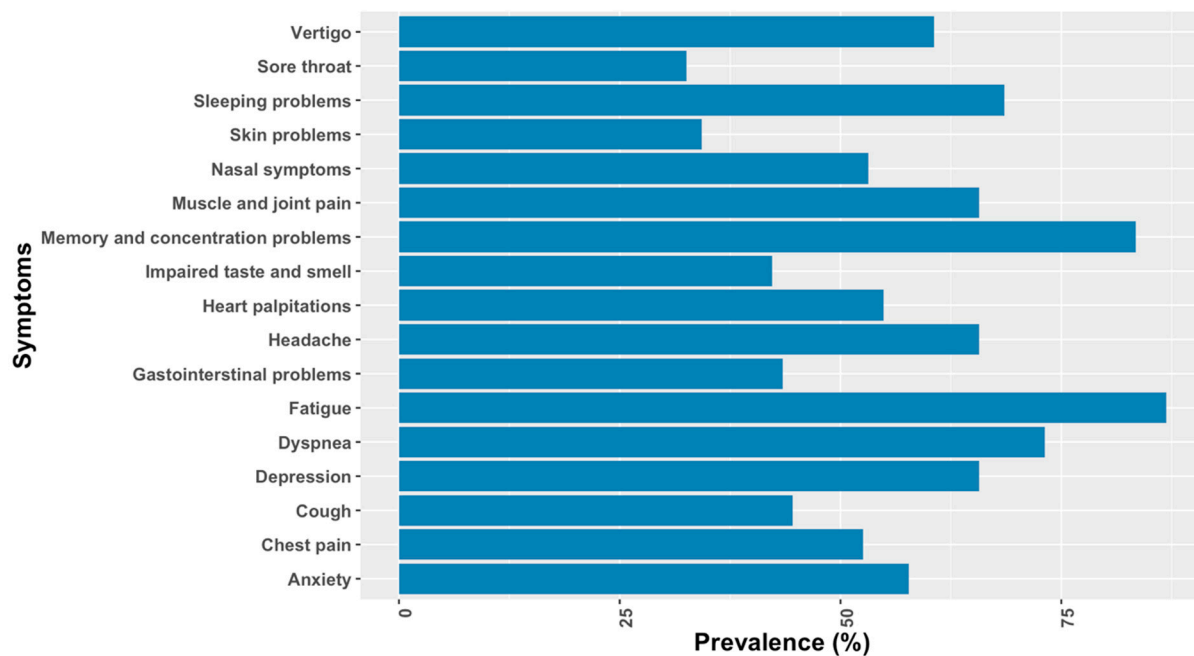

Table S1: The frequency of missing values.

| Variable                  | Missing (n) |
|---------------------------|-------------|
| Country of birth          | 2           |
| Education level           | 5           |
| Working status            | 1           |
| Working classification    | 42          |
| Smoking                   | 1           |
| Snuff                     | 2           |
| BMI                       | 5           |
| Hospitalized              | 6           |
| Symptom severity at onset | 2           |
| Cough                     | 2           |
| Chest pain                | 2           |

Figure S2: Variance Inflation Factor (VIF) values for EQ-5D-5L dimensions.

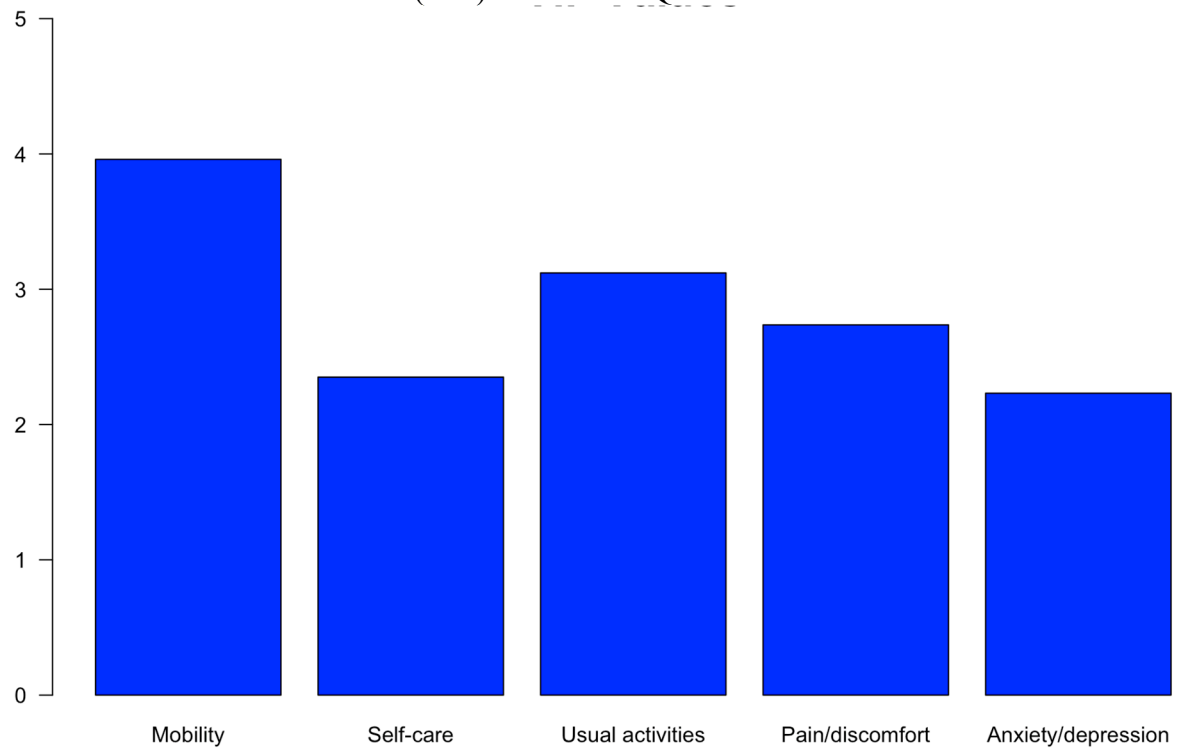

Figure S3: Heatmap of Spearman's rank correlation coefficients. The blue color represents a positive correlation and the red color represents a negative correlation between two variables. The scale to the right of the heatmap shows the strength of the correlation coefficient between the variables.

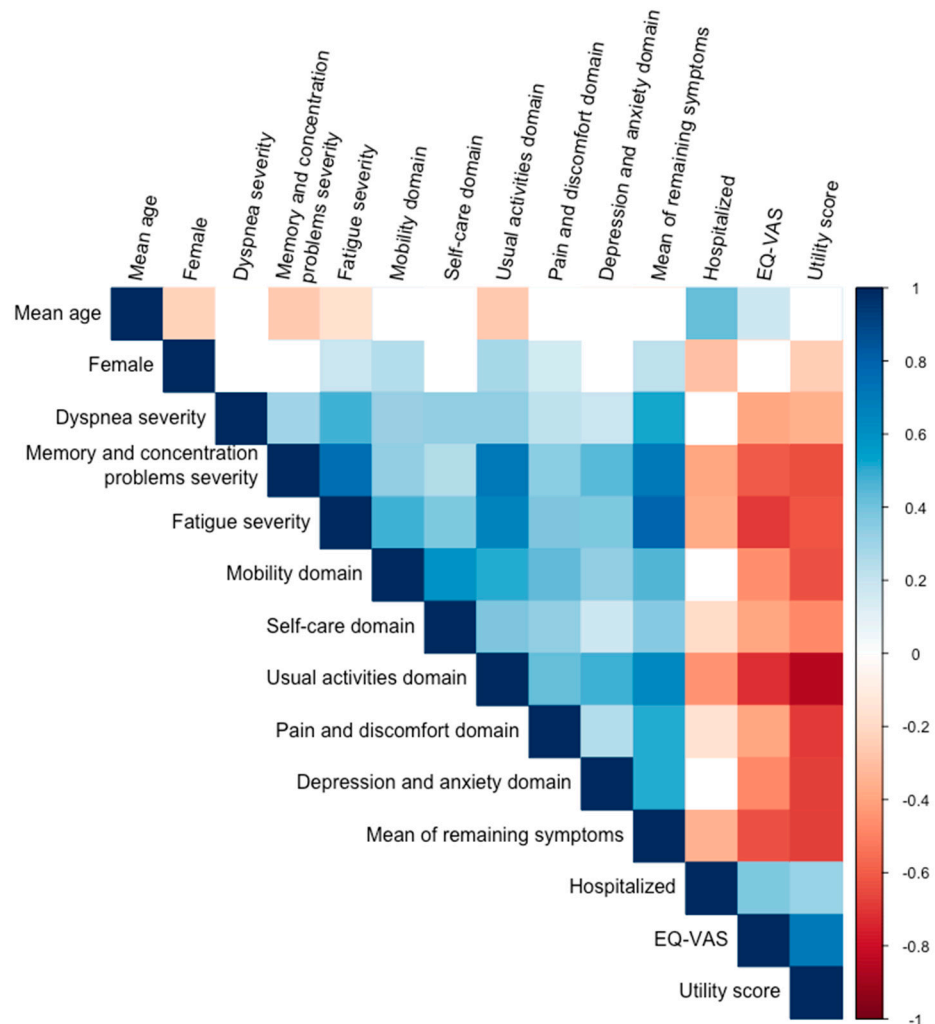

Supplement: s1 [file s1]
